# Supplementary material for: Maize GOLDEN2-LIKE genes enhance biomass and grain yields in rice by improving photosynthesis and reducing photoinhibition
Source: PubMed Central journal article supplement (PMC7113295; doi:10.1038/s42003-020-0887-3), 2020-04-01

**Fig. 2k – D1**

**0h-HL-H<sub>2</sub>O**

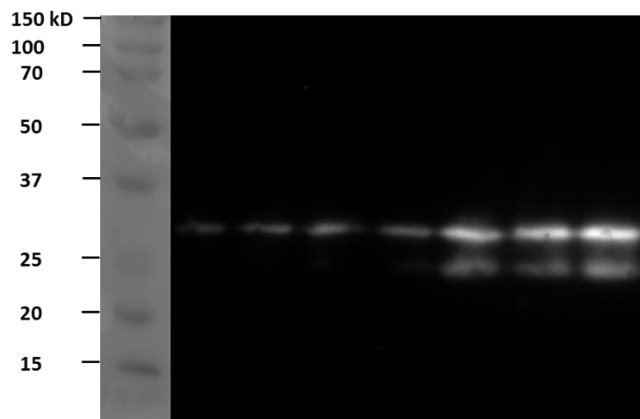

**0h-HL-Lin**

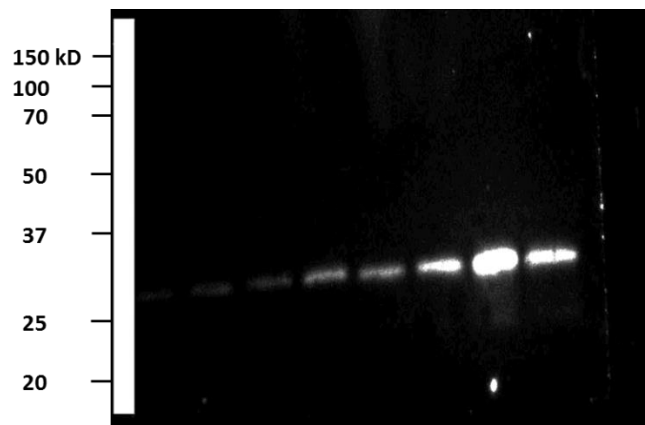

**4h-HL-H<sub>2</sub>O**

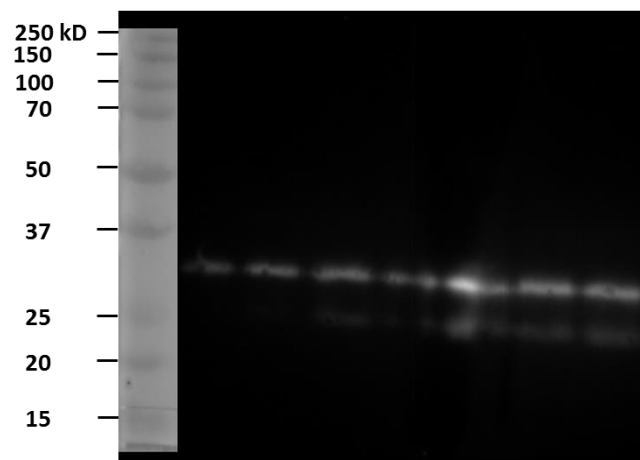

4h-HL-Lin

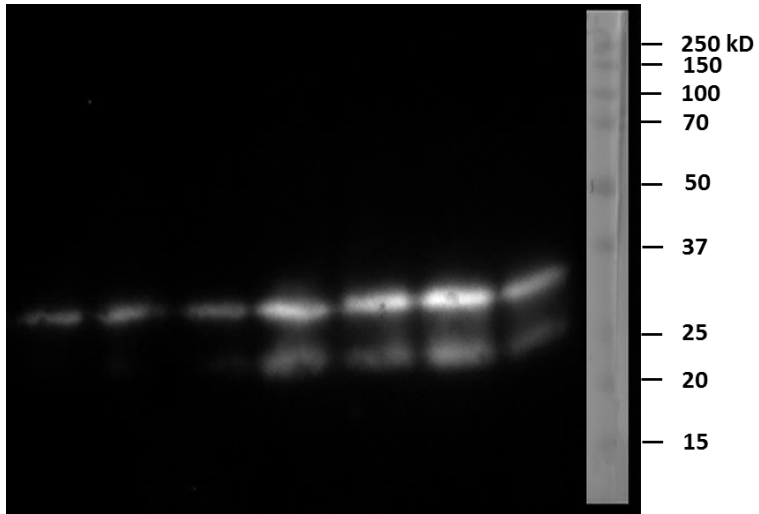

CBB

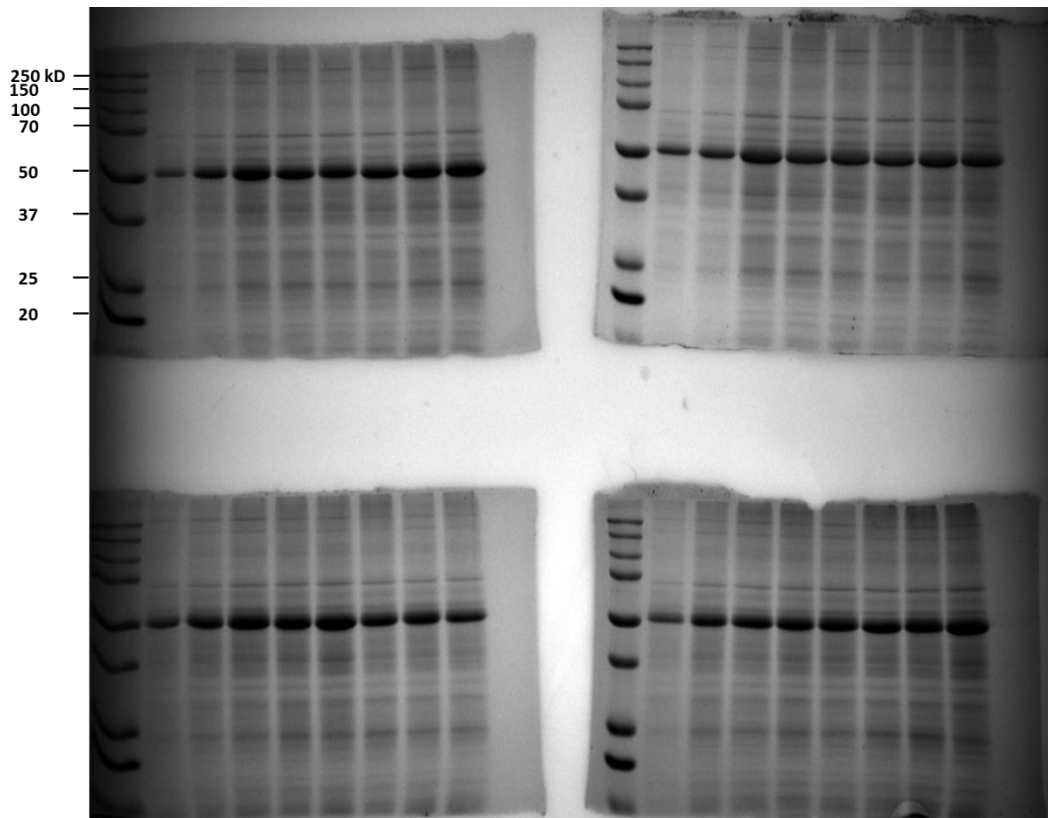

## Supplementary Figure 2b

### Lhca1

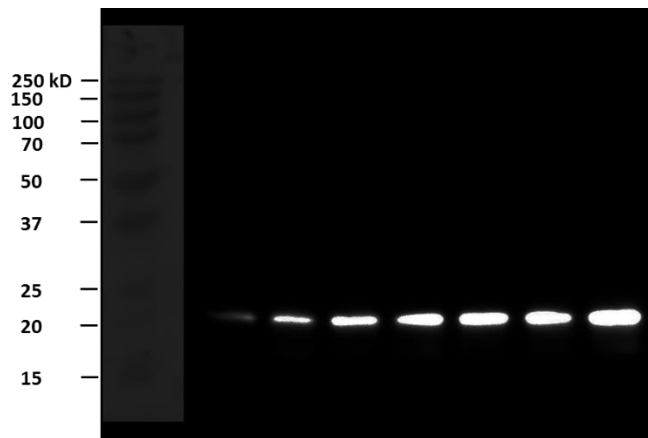

### Lhcb2

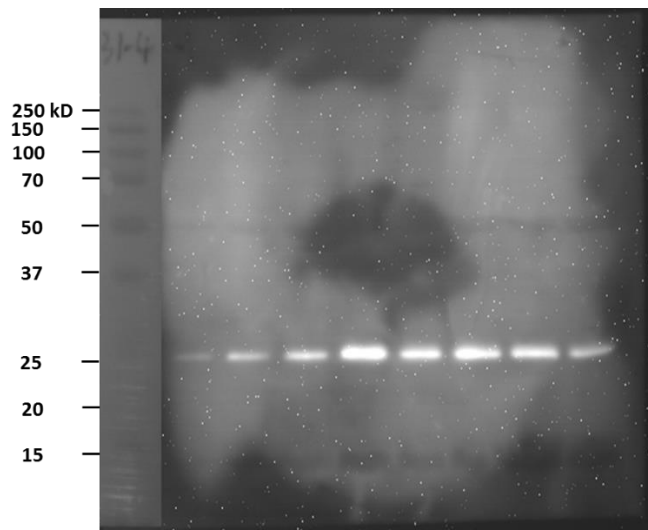

### PsaA

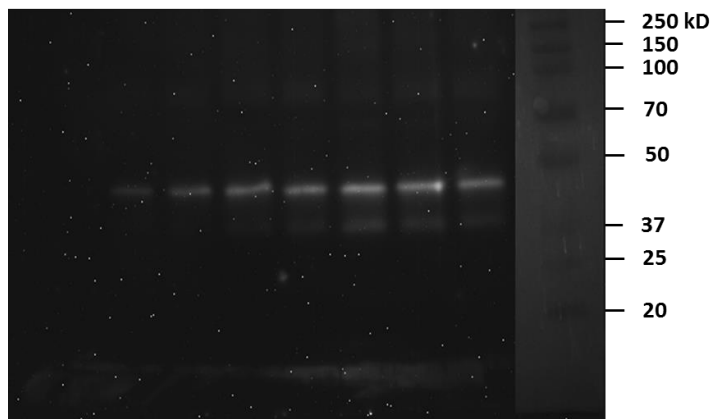

**D1**

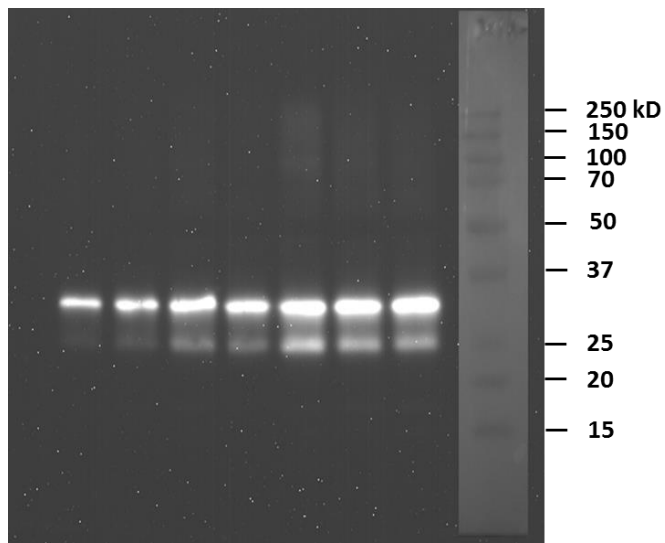

**PsbS**

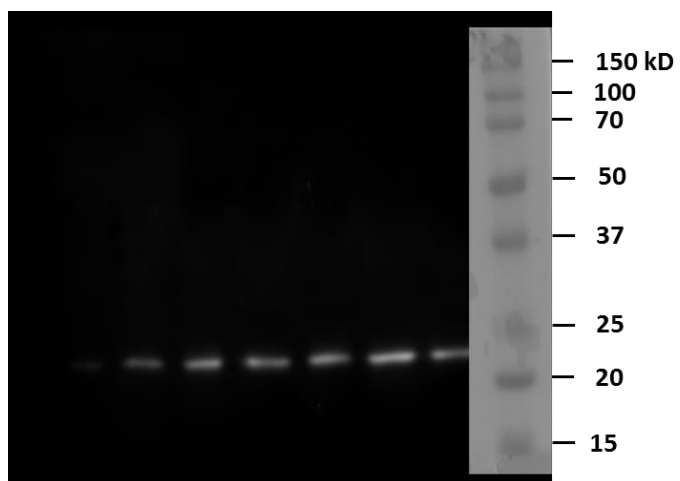

**Cytb6**

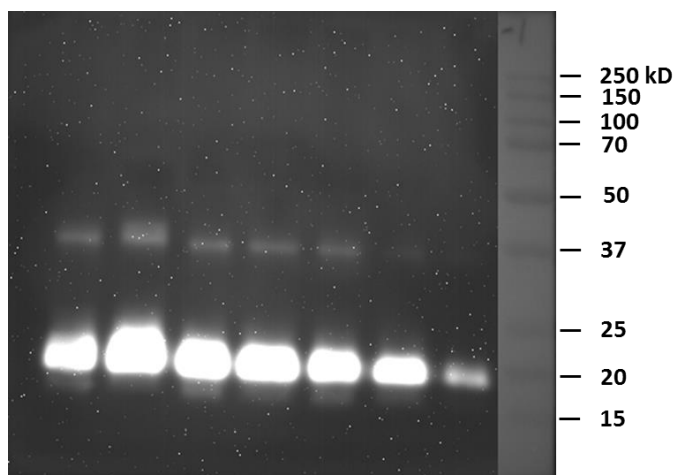

### AtpA

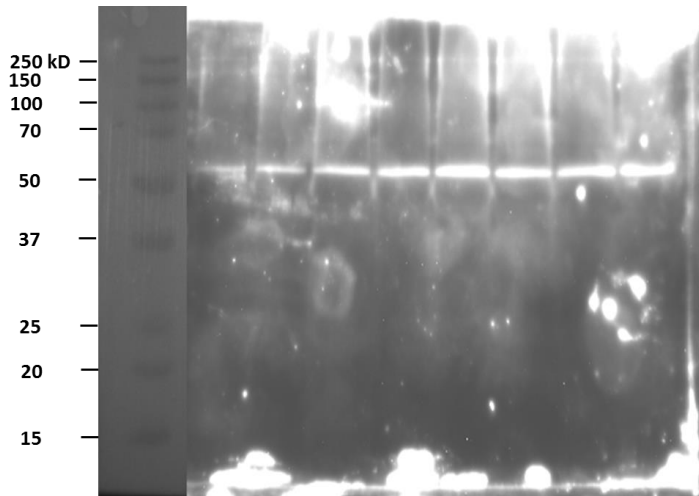

### AtpB

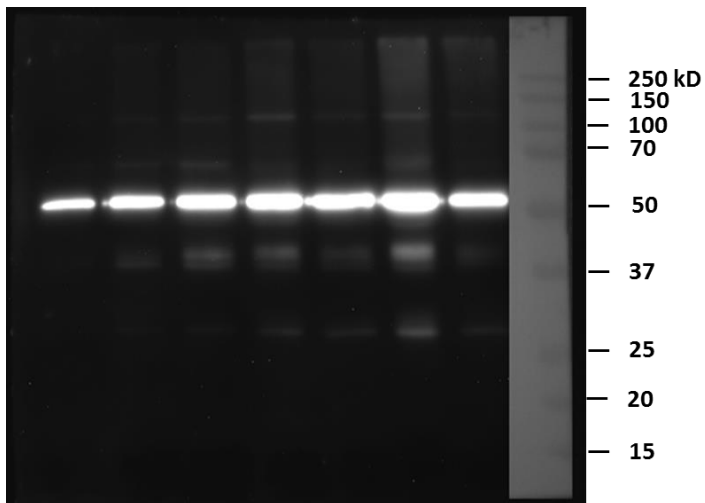

### CBB

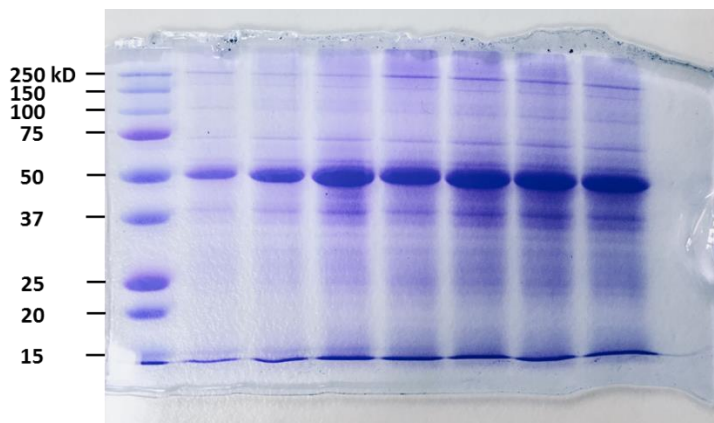

Supplement: 42003_2020_887_MOESM5_ESM.pdf [file 42003_2020_887_MOESM5_ESM.pdf]
